# Supplementary material
Source: Springer Nature journal article supplement (https://www.springermedizin.de/resource/supplementary/13075_2007_2191_MOESM5_ESM.pdf/9691528)

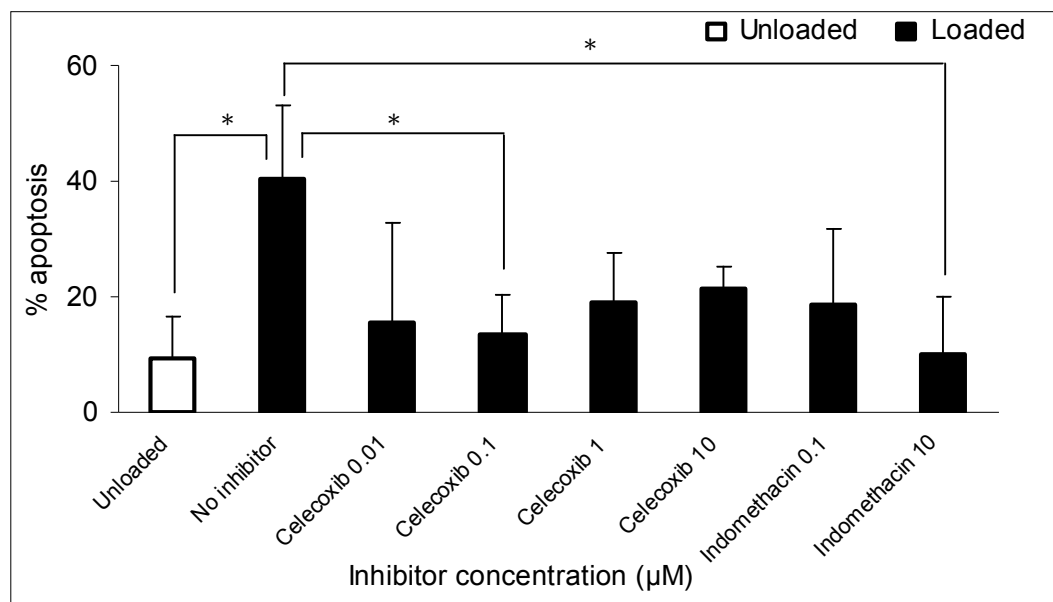

Supplement: MOESM5 [file 9691528]
